## **Werner syndrome protein participates in a complex with RAD51, RAD54, RAD54B and ATR in response to ICL-induced replication arrest**

**Marit Otterlei, Per Bruheim, Byungchan Ahn, Wendy Bussen, Parimal Karmakar, Kathy Baynton and Vilhelm A. Bohr**

*Journal of Cell Science* 119, 5215 (2006) doi:10.1242/jcs.03359

There was an error in the first e-press version of the article published in *J. Cell Sci.* **119**, 5137-5146.

The first e-press version of this article gave the page range as 5114-5123, whereas it should have been 5137-5146.

We apologise for this mistake.
